# Supplementary material for: The association between BMI and kidney cancer risk: An updated dose-response meta-analysis in accordance with PRISMA guideline
Source: PubMed Central journal article supplement — Medicine (Baltimore). 2018 Nov 2;97(44):e12860. doi: 10.1097/MD.0000000000012860 (PMC6221676; doi:10.1097/md.0000000000012860), 2018-11-02
Supplement: medi-97-e12860-s001.pdf [file medi-97-e12860-s001.pdf]

## Supplementary Figure

**Supplementary Figure 1: Sensitivity analysis corresponding to the random-effects meta-analysis of the relationship between (a) overweight and kidney cancer risk; (b) obesity and kidney cancer risk; (c) BMI and kidney cancer risk. BMI, body mass index.**

## Data for analysis

| study               | gender | rr   | lci  | uci  |
|---------------------|--------|------|------|------|
| Been 2016           | M+W    | 1.14 | 0.8  | 1.6  |
| Geoffrey 2015       | W      | 1.36 | 0.96 | 1.91 |
| Kristen 2014        | M+W    | 1.32 | 1.03 | 1.7  |
| Kabat 2013          | W      | 1.54 | 0.97 | 2.43 |
| Kabat 2013          | W      | 1.43 | 0.89 | 2.28 |
| Karami 2013         | W      | 1.41 | 1.15 | 1.74 |
| Karami 2013         | W      | 1.54 | 1.07 | 2.24 |
| Lieba 2013          | M      | 1.26 | 0.78 | 2.02 |
| Lieba 2013          | M      | 2.63 | 1.67 | 4.1  |
| Macleod 2013        | M+W    | 1.23 | 0.88 | 1.72 |
| Haggstrom 2013      | M      | 0.94 | 0.68 | 1.29 |
| Haggstrom 2013      | M      | 1.28 | 0.95 | 1.73 |
| Haggstrom 2013      | W      | 1.74 | 1.02 | 2.94 |
| Van Hemelrijck 2012 | M+W    | 1.37 | 1    | 1.89 |
| Sawada 2010         | M      | 1.39 | 0.73 | 2.63 |
| Sawada 2010         | M      | 1.99 | 1.04 | 3.81 |
| Sawada 2010         | W      | 1.55 | 0.76 | 3.18 |
| Adams 2008          | M      | 1.43 | 1.07 | 1.92 |
| Adams 2008          | M      | 1.64 | 1.22 | 2.22 |
| Song 2008           | W      | 2.16 | 0.88 | 5.3  |
| Song 2008           | W      | 2.12 | 0.81 | 5.58 |
| Setiawan 2007       | M      | 1.14 | 0.84 | 1.55 |
| Setiawan 2007       | W      | 2.03 | 1.31 | 3.15 |
| Reeves 2007         | M+W    | 1.1  | 0.94 | 1.28 |
| Reeves 2007         | M+W    | 1.19 | 0.99 | 1.44 |
| Luo 2007            | W      | 1.2  | 0.9  | 1.7  |
| Lukanova 2006       | M      | 1.3  | 0.51 | 3.56 |
| Lukanova 2006       | W      | 0.92 | 0.31 | 2.58 |
| Pischon 2006        | M      | 0.67 | 0.39 | 1.18 |
| Pischon 2006        | M      | 0.84 | 0.49 | 1.43 |
| Pischon 2006        | W      | 1.99 | 1.03 | 3.88 |
| Samanic 2006        | M      | 1.28 | 1.1  | 1.49 |

|                |     |      |      |      |
|----------------|-----|------|------|------|
| Oh 2005        | M   | 1.23 | 0.94 | 1.61 |
| Oh 2005        | M   | 1.89 | 1.37 | 2.6  |
| Flaherty 2005  | M   | 2.4  | 0.9  | 6.8  |
| Flaherty 2005  | M   | 2.1  | 0.7  | 6.6  |
| Flaherty 2005  | W   | 1.6  | 0.9  | 2.5  |
| Flaherty 2005  | W   | 2.2  | 1.2  | 4.1  |
| Van Dijk 2004  | M+W | 0.92 | 0.61 | 1.38 |
| Van Dijk 2004  | M+W | 1.46 | 0.97 | 2.21 |
| Nicodemus 2004 | W   | 1.46 | 0.77 | 2.74 |
| Nicodemus 2004 | W   | 1.87 | 1.02 | 3.41 |
| Bjorge 2004    | M   | 1.18 | 1.11 | 1.26 |
| Bjorge 2004    | W   | 1.32 | 1.21 | 1.45 |
| Chow 2000      | M   | 1.7  | 1.1  | 2.5  |
| Chow 2000      | M   | 1.9  | 1.3  | 2.7  |

---

| study               | gender | rr   | lci  | uci  |
|---------------------|--------|------|------|------|
| Been 2016           | M+W    | 1.04 | 0.64 | 1.7  |
| Geoffrey 2015       | W      | 1.73 | 1.24 | 2.42 |
| Kristen 2014        | M+W    | 1.47 | 1.1  | 1.96 |
| Kristen 2014        | M+W    | 1.91 | 1.33 | 2.75 |
| Kristen 2014        | M+W    | 2.48 | 1.61 | 3.8  |
| Karami 2013         | W      | 2.41 | 1.98 | 2.94 |
| Karami 2013         | W      | 2.49 | 1.74 | 3.57 |
| Macleod 2013        | M+W    | 1.2  | 0.81 | 1.78 |
| Macleod 2013        | M+W    | 1.71 | 1.06 | 2.79 |
| Haggstrom 2013      | M      | 1.51 | 1.13 | 2.03 |
| Haggstrom 2013      | W      | 2.21 | 1.32 | 3.7  |
| Van Hemelrijck 2012 | M+W    | 1.06 | 0.58 | 1.93 |
| Adams 2008          | M      | 1.87 | 1.38 | 2.53 |
| Adams 2008          | M      | 2.47 | 1.72 | 3.53 |
| Song 2008           | W      | 3.25 | 0.95 | 11.1 |
| Setiawan 2007       | M      | 1.76 | 1.2  | 2.58 |
| Setiawan 2007       | W      | 2.27 | 1.37 | 3.74 |
| Reeves 2007         | M+W    | 1.52 | 1.31 | 1.77 |
| Luo 2007            | W      | 1.5  | 1    | 2.1  |
| Luo 2007            | W      | 1.6  | 1.1  | 2.4  |

|                |     |      |      |       |
|----------------|-----|------|------|-------|
| Lukanova 2006  | M   | 3.63 | 1.23 | 10.66 |
| Lukanova 2006  | W   | 1.79 | 0.55 | 5.27  |
| Pischon 2006   | M   | 1.22 | 0.74 | 2.03  |
| Pischon 2006   | W   | 2.25 | 1.14 | 4.44  |
| Samanic 2006   | M   | 1.82 | 1.41 | 2.35  |
| Oh 2005        | M   | 1.62 | 0.66 | 3.94  |
| Flaherty 2005  | M   | 2.1  | 0.7  | 6.8   |
| Van Dijk 2004  | M+W | 1.04 | 0.54 | 1.99  |
| Nicodemus 2004 | W   | 2.49 | 1.39 | 4.44  |
| Bjorge 2004    | M   | 1.55 | 1.36 | 1.76  |
| Bjorge 2004    | W   | 1.85 | 1.66 | 2.06  |

| study               | location | rr   | lci  | uci  |
|---------------------|----------|------|------|------|
| Been 2016           | Europe   | 1.14 | 0.8  | 1.6  |
| Geoffrey 2015       | N A      | 1.36 | 0.96 | 1.91 |
| Kristen 2014        | N A      | 1.32 | 1.03 | 1.7  |
| Kabat 2013          | N A      | 1.54 | 0.97 | 2.43 |
| Kabat 2013          | N A      | 1.43 | 0.89 | 2.28 |
| Karami 2013         | N A      | 1.41 | 1.15 | 1.74 |
| Karami 2013         | N A      | 1.54 | 1.07 | 2.24 |
| Lieba 2013          | Asia     | 1.26 | 0.78 | 2.02 |
| Lieba 2013          | Asia     | 2.63 | 1.67 | 4.1  |
| Macleod 2013        | N A      | 1.23 | 0.88 | 1.72 |
| Haggstrom 2013      | Europe   | 0.94 | 0.68 | 1.29 |
| Haggstrom 2013      | Europe   | 1.28 | 0.95 | 1.73 |
| Haggstrom 2013      | Europe   | 1.74 | 1.02 | 2.94 |
| Van Hemelrijck 2012 | Europe   | 1.37 | 1    | 1.89 |
| Sawada 2010         | Asia     | 1.39 | 0.73 | 2.63 |
| Sawada 2010         | Asia     | 1.99 | 1.04 | 3.81 |
| Sawada 2010         | Asia     | 1.55 | 0.76 | 3.18 |
| Adams 2008          | N A      | 1.43 | 1.07 | 1.92 |
| Adams 2008          | N A      | 1.64 | 1.22 | 2.22 |
| Song 2008           | Asia     | 2.16 | 0.88 | 5.3  |
| Song 2008           | Asia     | 2.12 | 0.81 | 5.58 |
| Setiawan 2007       | N A      | 1.14 | 0.84 | 1.55 |
| Setiawan 2007       | N A      | 2.03 | 1.31 | 3.15 |
| Reeves 2007         | Europe   | 1.1  | 0.94 | 1.28 |
| Reeves 2007         | Europe   | 1.19 | 0.99 | 1.44 |
| Luo 2007            | N A      | 1.2  | 0.9  | 1.7  |
| Lukanova 2006       | Europe   | 1.3  | 0.51 | 3.56 |
| Lukanova 2006       | Europe   | 0.92 | 0.31 | 2.58 |
| Pischon 2006        | Europe   | 0.67 | 0.39 | 1.18 |
| Pischon 2006        | Europe   | 0.84 | 0.49 | 1.43 |

|                |        |      |      |      |
|----------------|--------|------|------|------|
| Pischon 2006   | Europe | 1.99 | 1.03 | 3.88 |
| Samanic 2006   | Europe | 1.28 | 1.1  | 1.49 |
| Oh 2005        | Asia   | 1.23 | 0.94 | 1.61 |
| Oh 2005        | Asia   | 1.89 | 1.37 | 2.6  |
| Flaherty 2005  | N A    | 2.4  | 0.9  | 6.8  |
| Flaherty 2005  | N A    | 2.1  | 0.7  | 6.6  |
| Flaherty 2005  | N A    | 1.6  | 0.9  | 2.5  |
| Flaherty 2005  | N A    | 2.2  | 1.2  | 4.1  |
| Van Dijk 2004  | Europe | 0.92 | 0.61 | 1.38 |
| Van Dijk 2004  | Europe | 1.46 | 0.97 | 2.21 |
| Nicodemus 2004 | N A    | 1.46 | 0.77 | 2.74 |
| Nicodemus 2004 | N A    | 1.87 | 1.02 | 3.41 |
| Bjorge 2004    | Europe | 1.18 | 1.11 | 1.26 |
| Bjorge 2004    | Europe | 1.32 | 1.21 | 1.45 |
| Chow 2000      | N A    | 1.7  | 1.1  | 2.5  |
| Chow 2000      | N A    | 1.9  | 1.3  | 2.7  |

| study               | location | rr   | lci  | uci   |
|---------------------|----------|------|------|-------|
| Been 2016           | Europe   | 1.04 | 0.64 | 1.7   |
| Geoffrey 2015       | N A      | 1.73 | 1.24 | 2.42  |
| Kristen 2014        | N A      | 1.47 | 1.1  | 1.96  |
| Kristen 2014        | N A      | 1.91 | 1.33 | 2.75  |
| Kristen 2014        | N A      | 2.48 | 1.61 | 3.8   |
| Karami 2013         | N A      | 2.41 | 1.98 | 2.94  |
| Karami 2013         | N A      | 2.49 | 1.74 | 3.57  |
| Macleod 2013        | N A      | 1.2  | 0.81 | 1.78  |
| Macleod 2013        | N A      | 1.71 | 1.06 | 2.79  |
| Haggstrom 2013      | Europe   | 1.51 | 1.13 | 2.03  |
| Haggstrom 2013      | Europe   | 2.21 | 1.32 | 3.7   |
| Van Hemelrijck 2012 | Europe   | 1.06 | 0.58 | 1.93  |
| Adams 2008          | N A      | 1.87 | 1.38 | 2.53  |
| Adams 2008          | N A      | 2.47 | 1.72 | 3.53  |
| Song 2008           | Asia     | 3.25 | 0.95 | 11.1  |
| Setiawan 2007       | N A      | 1.76 | 1.2  | 2.58  |
| Setiawan 2007       | N A      | 2.27 | 1.37 | 3.74  |
| Reeves 2007         | Europe   | 1.52 | 1.31 | 1.77  |
| Luo 2007            | N A      | 1.5  | 1    | 2.1   |
| Luo 2007            | N A      | 1.6  | 1.1  | 2.4   |
| Lukanova 2006       | Europe   | 3.63 | 1.23 | 10.66 |
| Lukanova 2006       | Europe   | 1.79 | 0.55 | 5.27  |
| Pischon 2006        | Europe   | 1.22 | 0.74 | 2.03  |
| Pischon 2006        | Europe   | 2.25 | 1.14 | 4.44  |
| Samanic 2006        | Europe   | 1.82 | 1.41 | 2.35  |
| Oh 2005             | Asia     | 1.62 | 0.66 | 3.94  |
| Flaherty 2005       | N A      | 2.1  | 0.7  | 6.8   |
| Van Dijk 2004       | Europe   | 1.04 | 0.54 | 1.99  |

|                |        |      |      |      |
|----------------|--------|------|------|------|
| Nicodemus 2004 | N A    | 2.49 | 1.39 | 4.44 |
| Bjorge 2004    | Europe | 1.55 | 1.36 | 1.76 |
| Bjorge 2004    | Europe | 1.85 | 1.66 | 2.06 |

| study               | assessment | rr   | lci  | uci  |
|---------------------|------------|------|------|------|
| Been 2016           | M          | 1.14 | 0.8  | 1.6  |
| Geoffrey 2015       | S          | 1.36 | 0.96 | 1.91 |
| Kristen 2014        | S          | 1.32 | 1.03 | 1.7  |
| Kabat 2013          | M          | 1.54 | 0.97 | 2.43 |
| Kabat 2013          | M          | 1.43 | 0.89 | 2.28 |
| Karami 2013         | S          | 1.41 | 1.15 | 1.74 |
| Karami 2013         | S          | 1.54 | 1.07 | 2.24 |
| Lieba 2013          | M          | 1.26 | 0.78 | 2.02 |
| Lieba 2013          | M          | 2.63 | 1.67 | 4.1  |
| Macleod 2013        | S          | 1.23 | 0.88 | 1.72 |
| Haggstrom 2013      | S          | 0.94 | 0.68 | 1.29 |
| Haggstrom 2013      | S          | 1.28 | 0.95 | 1.73 |
| Haggstrom 2013      | S          | 1.74 | 1.02 | 2.94 |
| Van Hemelrijck 2012 | M          | 1.37 | 1    | 1.89 |
| Sawada 2010         | S          | 1.39 | 0.73 | 2.63 |
| Sawada 2010         | S          | 1.99 | 1.04 | 3.81 |
| Sawada 2010         | S          | 1.55 | 0.76 | 3.18 |
| Adams 2008          | S          | 1.43 | 1.07 | 1.92 |
| Adams 2008          | S          | 1.64 | 1.22 | 2.22 |
| Song 2008           | M          | 2.16 | 0.88 | 5.3  |
| Song 2008           | M          | 2.12 | 0.81 | 5.58 |
| Setiawan 2007       | S          | 1.14 | 0.84 | 1.55 |
| Setiawan 2007       | S          | 2.03 | 1.31 | 3.15 |
| Reeves 2007         | S          | 1.1  | 0.94 | 1.28 |
| Reeves 2007         | S          | 1.19 | 0.99 | 1.44 |
| Luo 2007            | M          | 1.2  | 0.9  | 1.7  |
| Lukanova 2006       | M          | 1.3  | 0.51 | 3.56 |
| Lukanova 2006       | M          | 0.92 | 0.31 | 2.58 |
| Pischon 2006        | M          | 0.67 | 0.39 | 1.18 |
| Pischon 2006        | M          | 0.84 | 0.49 | 1.43 |
| Pischon 2006        | M          | 1.99 | 1.03 | 3.88 |
| Samanic 2006        | M          | 1.28 | 1.1  | 1.49 |
| Oh 2005             | M          | 1.23 | 0.94 | 1.61 |
| Oh 2005             | M          | 1.89 | 1.37 | 2.6  |
| Flaherty 2005       | S          | 2.4  | 0.9  | 6.8  |
| Flaherty 2005       | S          | 2.1  | 0.7  | 6.6  |
| Flaherty 2005       | S          | 1.6  | 0.9  | 2.5  |

|                |   |      |      |      |
|----------------|---|------|------|------|
| Flaherty 2005  | S | 2.2  | 1.2  | 4.1  |
| Van Dijk 2004  | S | 0.92 | 0.61 | 1.38 |
| Van Dijk 2004  | S | 1.46 | 0.97 | 2.21 |
| Nicodemus 2004 | S | 1.46 | 0.77 | 2.74 |
| Nicodemus 2004 | S | 1.87 | 1.02 | 3.41 |
| Bjorge 2004    | M | 1.18 | 1.11 | 1.26 |
| Bjorge 2004    | M | 1.32 | 1.21 | 1.45 |
| Chow 2000      | S | 1.7  | 1.1  | 2.5  |
| Chow 2000      | S | 1.9  | 1.3  | 2.7  |

| study               | assessment | rr   | lci  | uci   |
|---------------------|------------|------|------|-------|
| Been 2016           | M          | 1.04 | 0.64 | 1.7   |
| Geoffrey 2015       | S          | 1.73 | 1.24 | 2.42  |
| Kristen 2014        | S          | 1.47 | 1.1  | 1.96  |
| Kristen 2014        | S          | 1.91 | 1.33 | 2.75  |
| Kristen 2014        | S          | 2.48 | 1.61 | 3.8   |
| Karami 2013         | S          | 2.41 | 1.98 | 2.94  |
| Karami 2013         | S          | 2.49 | 1.74 | 3.57  |
| Macleod 2013        | S          | 1.2  | 0.81 | 1.78  |
| Macleod 2013        | S          | 1.71 | 1.06 | 2.79  |
| Haggstrom 2013      | S          | 1.51 | 1.13 | 2.03  |
| Haggstrom 2013      | S          | 2.21 | 1.32 | 3.7   |
| Van Hemelrijck 2012 | M          | 1.06 | 0.58 | 1.93  |
| Adams 2008          | S          | 1.87 | 1.38 | 2.53  |
| Adams 2008          | S          | 2.47 | 1.72 | 3.53  |
| Song 2008           | M          | 3.25 | 0.95 | 11.1  |
| Setiawan 2007       | S          | 1.76 | 1.2  | 2.58  |
| Setiawan 2007       | S          | 2.27 | 1.37 | 3.74  |
| Reeves 2007         | S          | 1.52 | 1.31 | 1.77  |
| Luo 2007            | M          | 1.5  | 1    | 2.1   |
| Luo 2007            | M          | 1.6  | 1.1  | 2.4   |
| Lukanova 2006       | M          | 3.63 | 1.23 | 10.66 |
| Lukanova 2006       | M          | 1.79 | 0.55 | 5.27  |
| Pischon 2006        | M          | 1.22 | 0.74 | 2.03  |
| Pischon 2006        | M          | 2.25 | 1.14 | 4.44  |
| Samanic 2006        | M          | 1.82 | 1.41 | 2.35  |
| Oh 2005             | M          | 1.62 | 0.66 | 3.94  |
| Flaherty 2005       | S          | 2.1  | 0.7  | 6.8   |
| Van Dijk 2004       | S          | 1.04 | 0.54 | 1.99  |
| Nicodemus 2004      | S          | 2.49 | 1.39 | 4.44  |
| Bjorge 2004         | M          | 1.55 | 1.36 | 1.76  |

|             |   |      |      |      |
|-------------|---|------|------|------|
| Bjorge 2004 | M | 1.85 | 1.66 | 2.06 |
|-------------|---|------|------|------|

| study               | duration | rr   | lci  | uci  |
|---------------------|----------|------|------|------|
| Been 2016           | 1        | 1.14 | 0.8  | 1.6  |
| Geoffrey 2015       | 1        | 1.36 | 0.96 | 1.91 |
| Kristen 2014        | 1        | 1.32 | 1.03 | 1.7  |
| Kabat 2013          | 1        | 1.54 | 0.97 | 2.43 |
| Kabat 2013          | 1        | 1.43 | 0.89 | 2.28 |
| Karami 2013         | 2        | 1.41 | 1.15 | 1.74 |
| Karami 2013         | 1        | 1.54 | 1.07 | 2.24 |
| Lieba 2013          | 1        | 1.26 | 0.78 | 2.02 |
| Lieba 2013          | 1        | 2.63 | 1.67 | 4.1  |
| Macleod 2013        | 2        | 1.23 | 0.88 | 1.72 |
| Haggstrom 2013      | 2        | 0.94 | 0.68 | 1.29 |
| Haggstrom 2013      | 2        | 1.28 | 0.95 | 1.73 |
| Haggstrom 2013      | 2        | 1.74 | 1.02 | 2.94 |
| Van Hemelrijck 2012 | 1        | 1.37 | 1    | 1.89 |
| Sawada 2010         | 1        | 1.39 | 0.73 | 2.63 |
| Sawada 2010         | 1        | 1.99 | 1.04 | 3.81 |
| Sawada 2010         | 1        | 1.55 | 0.76 | 3.18 |
| Adams 2008          | 2        | 1.43 | 1.07 | 1.92 |
| Adams 2008          | 2        | 1.64 | 1.22 | 2.22 |
| Song 2008           | 2        | 2.16 | 0.88 | 5.3  |
| Song 2008           | 2        | 2.12 | 0.81 | 5.58 |
| Setiawan 2007       | 2        | 1.14 | 0.84 | 1.55 |
| Setiawan 2007       | 2        | 2.03 | 1.31 | 3.15 |
| Reeves 2007         | 2        | 1.1  | 0.94 | 1.28 |
| Reeves 2007         | 2        | 1.19 | 0.99 | 1.44 |
| Luo 2007            | 2        | 1.2  | 0.9  | 1.7  |
| Lukanova 2006       | 2        | 1.3  | 0.51 | 3.56 |
| Lukanova 2006       | 2        | 0.92 | 0.31 | 2.58 |
| Pischon 2006        | 2        | 0.67 | 0.39 | 1.18 |
| Pischon 2006        | 2        | 0.84 | 0.49 | 1.43 |
| Pischon 2006        | 2        | 1.99 | 1.03 | 3.88 |
| Samanic 2006        | 1        | 1.28 | 1.1  | 1.49 |
| Oh 2005             | 2        | 1.23 | 0.94 | 1.61 |
| Oh 2005             | 2        | 1.89 | 1.37 | 2.6  |
| Flaherty 2005       | 1        | 2.4  | 0.9  | 6.8  |
| Flaherty 2005       | 1        | 2.1  | 0.7  | 6.6  |
| Flaherty 2005       | 1        | 1.6  | 0.9  | 2.5  |
| Flaherty 2005       | 1        | 2.2  | 1.2  | 4.1  |



|                |   |      |      |      |
|----------------|---|------|------|------|
| Van Dijk 2004  | 2 | 0.92 | 0.61 | 1.38 |
| Van Dijk 2004  | 2 | 1.46 | 0.97 | 2.21 |
| Nicodemus 2004 | 1 | 1.46 | 0.77 | 2.74 |
| Nicodemus 2004 | 1 | 1.87 | 1.02 | 3.41 |
| Bjorge 2004    | 1 | 1.18 | 1.11 | 1.26 |
| Bjorge 2004    | 1 | 1.32 | 1.21 | 1.45 |
| Chow 2000      | 1 | 1.7  | 1.1  | 2.5  |
| Chow 2000      | 1 | 1.9  | 1.3  | 2.7  |

| study               | duration | rr   | lci  | uci   |
|---------------------|----------|------|------|-------|
| Been 2016           | 1        | 1.04 | 0.64 | 1.7   |
| Geoffrey 2015       | 1        | 1.73 | 1.24 | 2.42  |
| Kristen 2014        | 1        | 1.47 | 1.1  | 1.96  |
| Kristen 2014        | 1        | 1.91 | 1.33 | 2.75  |
| Kristen 2014        | 1        | 2.48 | 1.61 | 3.8   |
| Karami 2013         | 2        | 2.41 | 1.98 | 2.94  |
| Karami 2013         | 1        | 2.49 | 1.74 | 3.57  |
| Macleod 2013        | 2        | 1.2  | 0.81 | 1.78  |
| Macleod 2013        | 2        | 1.71 | 1.06 | 2.79  |
| Haggstrom 2013      | 2        | 1.51 | 1.13 | 2.03  |
| Haggstrom 2013      | 2        | 2.21 | 1.32 | 3.7   |
| Van Hemelrijck 2012 | 1        | 1.06 | 0.58 | 1.93  |
| Adams 2008          | 2        | 1.87 | 1.38 | 2.53  |
| Adams 2008          | 2        | 2.47 | 1.72 | 3.53  |
| Song 2008           | 2        | 3.25 | 0.95 | 11.1  |
| Setiawan 2007       | 2        | 1.76 | 1.2  | 2.58  |
| Setiawan 2007       | 2        | 2.27 | 1.37 | 3.74  |
| Reeves 2007         | 2        | 1.52 | 1.31 | 1.77  |
| Luo 2007            | 2        | 1.5  | 1    | 2.1   |
| Luo 2007            | 2        | 1.6  | 1.1  | 2.4   |
| Lukanova 2006       | 2        | 3.63 | 1.23 | 10.66 |
| Lukanova 2006       | 2        | 1.79 | 0.55 | 5.27  |
| Pischon 2006        | 2        | 1.22 | 0.74 | 2.03  |
| Pischon 2006        | 2        | 2.25 | 1.14 | 4.44  |
| Samanic 2006        | 1        | 1.82 | 1.41 | 2.35  |
| Oh 2005             | 2        | 1.62 | 0.66 | 3.94  |
| Flaherty 2005       | 1        | 2.1  | 0.7  | 6.8   |
| Van Dijk 2004       | 2        | 1.04 | 0.54 | 1.99  |
| Nicodemus 2004      | 1        | 2.49 | 1.39 | 4.44  |
| Bjorge 2004         | 1        | 1.55 | 1.36 | 1.76  |
| Bjorge 2004         | 1        | 1.85 | 1.66 | 2.06  |

| study               | smoking | rr   | lci  | uci  |
|---------------------|---------|------|------|------|
| Been 2016           | Y       | 1.14 | 0.8  | 1.6  |
| Geoffrey 2015       | Y       | 1.36 | 0.96 | 1.91 |
| Kristen 2014        | Y       | 1.32 | 1.03 | 1.7  |
| Kabat 2013          | Y       | 1.54 | 0.97 | 2.43 |
| Kabat 2013          | Y       | 1.43 | 0.89 | 2.28 |
| Karami 2013         | Y       | 1.41 | 1.15 | 1.74 |
| Karami 2013         | Y       | 1.54 | 1.07 | 2.24 |
| Lieba 2013          | N       | 1.26 | 0.78 | 2.02 |
| Lieba 2013          | N       | 2.63 | 1.67 | 4.1  |
| Macleod 2013        | Y       | 1.23 | 0.88 | 1.72 |
| Haggstrom 2013      | Y       | 0.94 | 0.68 | 1.29 |
| Haggstrom 2013      | Y       | 1.28 | 0.95 | 1.73 |
| Haggstrom 2013      | Y       | 1.74 | 1.02 | 2.94 |
| Van Hemelrijck 2012 | N       | 1.37 | 1    | 1.89 |
| Sawada 2010         | Y       | 1.39 | 0.73 | 2.63 |
| Sawada 2010         | Y       | 1.99 | 1.04 | 3.81 |
| Sawada 2010         | Y       | 1.55 | 0.76 | 3.18 |
| Adams 2008          | Y       | 1.43 | 1.07 | 1.92 |
| Adams 2008          | Y       | 1.64 | 1.22 | 2.22 |
| Song 2008           | Y       | 2.16 | 0.88 | 5.3  |
| Song 2008           | Y       | 2.12 | 0.81 | 5.58 |
| Setiawan 2007       | Y       | 1.14 | 0.84 | 1.55 |
| Setiawan 2007       | Y       | 2.03 | 1.31 | 3.15 |
| Reeves 2007         | Y       | 1.1  | 0.94 | 1.28 |
| Reeves 2007         | Y       | 1.19 | 0.99 | 1.44 |
| Luo 2007            | Y       | 1.2  | 0.9  | 1.7  |
| Lukanova 2006       | Y       | 1.3  | 0.51 | 3.56 |
| Lukanova 2006       | Y       | 0.92 | 0.31 | 2.58 |
| Pischon 2006        | Y       | 0.67 | 0.39 | 1.18 |
| Pischon 2006        | Y       | 0.84 | 0.49 | 1.43 |
| Pischon 2006        | Y       | 1.99 | 1.03 | 3.88 |
| Samanic 2006        | Y       | 1.28 | 1.1  | 1.49 |
| Oh 2005             | Y       | 1.23 | 0.94 | 1.61 |
| Oh 2005             | Y       | 1.89 | 1.37 | 2.6  |
| Flaherty 2005       | Y       | 2.4  | 0.9  | 6.8  |
| Flaherty 2005       | Y       | 2.1  | 0.7  | 6.6  |
| Flaherty 2005       | Y       | 1.6  | 0.9  | 2.5  |
| Flaherty 2005       | Y       | 2.2  | 1.2  | 4.1  |
| Van Dijk 2004       | Y       | 0.92 | 0.61 | 1.38 |
| Van Dijk 2004       | Y       | 1.46 | 0.97 | 2.21 |
| Nicodemus 2004      | N       | 1.46 | 0.77 | 2.74 |

|                |   |      |      |      |
|----------------|---|------|------|------|
| Nicodemus 2004 | N | 1.87 | 1.02 | 3.41 |
| Bjorge 2004    | N | 1.18 | 1.11 | 1.26 |
| Bjorge 2004    | N | 1.32 | 1.21 | 1.45 |
| Chow 2000      | Y | 1.7  | 1.1  | 2.5  |
| Chow 2000      | Y | 1.9  | 1.3  | 2.7  |

| study               | smoking | rr   | lci  | uci   |
|---------------------|---------|------|------|-------|
| Been 2016           | Y       | 1.04 | 0.64 | 1.7   |
| Geoffrey 2015       | Y       | 1.73 | 1.24 | 2.42  |
| Kristen 2014        | Y       | 1.47 | 1.1  | 1.96  |
| Kristen 2014        | Y       | 1.91 | 1.33 | 2.75  |
| Kristen 2014        | Y       | 2.48 | 1.61 | 3.8   |
| Karami 2013         | Y       | 2.41 | 1.98 | 2.94  |
| Karami 2013         | Y       | 2.49 | 1.74 | 3.57  |
| Macleod 2013        | Y       | 1.2  | 0.81 | 1.78  |
| Macleod 2013        | Y       | 1.71 | 1.06 | 2.79  |
| Haggstrom 2013      | Y       | 1.51 | 1.13 | 2.03  |
| Haggstrom 2013      | Y       | 2.21 | 1.32 | 3.7   |
| Van Hemelrijck 2012 | N       | 1.06 | 0.58 | 1.93  |
| Adams 2008          | Y       | 1.87 | 1.38 | 2.53  |
| Adams 2008          | Y       | 2.47 | 1.72 | 3.53  |
| Song 2008           | Y       | 3.25 | 0.95 | 11.1  |
| Setiawan 2007       | Y       | 1.76 | 1.2  | 2.58  |
| Setiawan 2007       | Y       | 2.27 | 1.37 | 3.74  |
| Reeves 2007         | Y       | 1.52 | 1.31 | 1.77  |
| Luo 2007            | Y       | 1.5  | 1    | 2.1   |
| Luo 2007            | Y       | 1.6  | 1.1  | 2.4   |
| Lukanova 2006       | Y       | 3.63 | 1.23 | 10.66 |
| Lukanova 2006       | Y       | 1.79 | 0.55 | 5.27  |
| Pischon 2006        | Y       | 1.22 | 0.74 | 2.03  |
| Pischon 2006        | Y       | 2.25 | 1.14 | 4.44  |
| Samanic 2006        | Y       | 1.82 | 1.41 | 2.35  |
| Oh 2005             | Y       | 1.62 | 0.66 | 3.94  |
| Flaherty 2005       | Y       | 2.1  | 0.7  | 6.8   |
| Van Dijk 2004       | Y       | 1.04 | 0.54 | 1.99  |
| Nicodemus 2004      | N       | 2.49 | 1.39 | 4.44  |
| Bjorge 2004         | N       | 1.55 | 1.36 | 1.76  |
| Bjorge 2004         | N       | 1.85 | 1.66 | 2.06  |

| study     | alcohol | rr   | lci | uci |
|-----------|---------|------|-----|-----|
| Been 2016 | Y       | 1.14 | 0.8 | 1.6 |

|                     |   |      |      |      |
|---------------------|---|------|------|------|
| Geoffrey 2015       | Y | 1.36 | 0.96 | 1.91 |
| Kristen 2014        | N | 1.32 | 1.03 | 1.7  |
| Kabat 2013          | N | 1.54 | 0.97 | 2.43 |
| Kabat 2013          | N | 1.43 | 0.89 | 2.28 |
| Karami 2013         | N | 1.41 | 1.15 | 1.74 |
| Karami 2013         | N | 1.54 | 1.07 | 2.24 |
| Lieba 2013          | N | 1.26 | 0.78 | 2.02 |
| Lieba 2013          | N | 2.63 | 1.67 | 4.1  |
| Macleod 2013        | Y | 1.23 | 0.88 | 1.72 |
| Haggstrom 2013      | N | 0.94 | 0.68 | 1.29 |
| Haggstrom 2013      | N | 1.28 | 0.95 | 1.73 |
| Haggstrom 2013      | N | 1.74 | 1.02 | 2.94 |
| Van Hemelrijck 2012 | N | 1.37 | 1    | 1.89 |
| Sawada 2010         | Y | 1.39 | 0.73 | 2.63 |
| Sawada 2010         | Y | 1.99 | 1.04 | 3.81 |
| Sawada 2010         | Y | 1.55 | 0.76 | 3.18 |
| Adams 2008          | N | 1.43 | 1.07 | 1.92 |
| Adams 2008          | N | 1.64 | 1.22 | 2.22 |
| Song 2008           | Y | 2.16 | 0.88 | 5.3  |
| Song 2008           | Y | 2.12 | 0.81 | 5.58 |
| Setiawan 2007       | Y | 1.14 | 0.84 | 1.55 |
| Setiawan 2007       | Y | 2.03 | 1.31 | 3.15 |
| Reeves 2007         | Y | 1.1  | 0.94 | 1.28 |
| Reeves 2007         | Y | 1.19 | 0.99 | 1.44 |
| Luo 2007            | N | 1.2  | 0.9  | 1.7  |
| Lukanova 2006       | N | 1.3  | 0.51 | 3.56 |
| Lukanova 2006       | N | 0.92 | 0.31 | 2.58 |
| Pischon 2006        | Y | 0.67 | 0.39 | 1.18 |
| Pischon 2006        | Y | 0.84 | 0.49 | 1.43 |
| Pischon 2006        | Y | 1.99 | 1.03 | 3.88 |
| Samanic 2006        | N | 1.28 | 1.1  | 1.49 |
| Oh 2005             | Y | 1.23 | 0.94 | 1.61 |
| Oh 2005             | Y | 1.89 | 1.37 | 2.6  |
| Flaherty 2005       | N | 2.4  | 0.9  | 6.8  |
| Flaherty 2005       | N | 2.1  | 0.7  | 6.6  |
| Flaherty 2005       | N | 1.6  | 0.9  | 2.5  |
| Flaherty 2005       | N | 2.2  | 1.2  | 4.1  |
| Van Dijk 2004       | N | 0.92 | 0.61 | 1.38 |
| Van Dijk 2004       | N | 1.46 | 0.97 | 2.21 |
| Nicodemus 2004      | N | 1.46 | 0.77 | 2.74 |
| Nicodemus 2004      | N | 1.87 | 1.02 | 3.41 |
| Bjorge 2004         | N | 1.18 | 1.11 | 1.26 |

|             |   |      |      |      |
|-------------|---|------|------|------|
| Bjorge 2004 | N | 1.32 | 1.21 | 1.45 |
| Chow 2000   | N | 1.7  | 1.1  | 2.5  |
| Chow 2000   | N | 1.9  | 1.3  | 2.7  |

| study               | alcohol | rr   | lci  | uci   |
|---------------------|---------|------|------|-------|
| Been 2016           | Y       | 1.04 | 0.64 | 1.7   |
| Geoffrey 2015       | Y       | 1.73 | 1.24 | 2.42  |
| Kristen 2014        | N       | 1.47 | 1.1  | 1.96  |
| Kristen 2014        | N       | 1.91 | 1.33 | 2.75  |
| Kristen 2014        | N       | 2.48 | 1.61 | 3.8   |
| Karami 2013         | N       | 2.41 | 1.98 | 2.94  |
| Karami 2013         | N       | 2.49 | 1.74 | 3.57  |
| Macleod 2013        | Y       | 1.2  | 0.81 | 1.78  |
| Macleod 2013        | Y       | 1.71 | 1.06 | 2.79  |
| Haggstrom 2013      | N       | 1.51 | 1.13 | 2.03  |
| Haggstrom 2013      | N       | 2.21 | 1.32 | 3.7   |
| Van Hemelrijck 2012 | N       | 1.06 | 0.58 | 1.93  |
| Adams 2008          | N       | 1.87 | 1.38 | 2.53  |
| Adams 2008          | N       | 2.47 | 1.72 | 3.53  |
| Song 2008           | Y       | 3.25 | 0.95 | 11.1  |
| Setiawan 2007       | Y       | 1.76 | 1.2  | 2.58  |
| Setiawan 2007       | Y       | 2.27 | 1.37 | 3.74  |
| Reeves 2007         | Y       | 1.52 | 1.31 | 1.77  |
| Luo 2007            | N       | 1.5  | 1    | 2.1   |
| Luo 2007            | N       | 1.6  | 1.1  | 2.4   |
| Lukanova 2006       | N       | 3.63 | 1.23 | 10.66 |
| Lukanova 2006       | N       | 1.79 | 0.55 | 5.27  |
| Pischon 2006        | Y       | 1.22 | 0.74 | 2.03  |
| Pischon 2006        | Y       | 2.25 | 1.14 | 4.44  |
| Samanic 2006        | N       | 1.82 | 1.41 | 2.35  |
| Oh 2005             | Y       | 1.62 | 0.66 | 3.94  |
| Flaherty 2005       | N       | 2.1  | 0.7  | 6.8   |
| Van Dijk 2004       | N       | 1.04 | 0.54 | 1.99  |
| Nicodemus 2004      | N       | 2.49 | 1.39 | 4.44  |
| Bjorge 2004         | N       | 1.55 | 1.36 | 1.76  |
| Bjorge 2004         | N       | 1.85 | 1.66 | 2.06  |

| study         | age | rr   | lci  | uci  |
|---------------|-----|------|------|------|
| Been 2016     | Y   | 1.14 | 0.8  | 1.6  |
| Geoffrey 2015 | Y   | 1.36 | 0.96 | 1.91 |
| Kristen 2014  | N   | 1.32 | 1.03 | 1.7  |
| Kabat 2013    | Y   | 1.54 | 0.97 | 2.43 |
| Kabat 2013    | Y   | 1.43 | 0.89 | 2.28 |
| Karami 2013   | N   | 1.41 | 1.15 | 1.74 |

|                     |   |      |      |      |
|---------------------|---|------|------|------|
| Karami 2013         | N | 1.54 | 1.07 | 2.24 |
| Lieba 2013          | N | 1.26 | 0.78 | 2.02 |
| Lieba 2013          | N | 2.63 | 1.67 | 4.1  |
| Macleod 2013        | Y | 1.23 | 0.88 | 1.72 |
| Haggstrom 2013      | Y | 0.94 | 0.68 | 1.29 |
| Haggstrom 2013      | Y | 1.28 | 0.95 | 1.73 |
| Haggstrom 2013      | Y | 1.74 | 1.02 | 2.94 |
| Van Hemelrijck 2012 | N | 1.37 | 1    | 1.89 |
| Sawada 2010         | Y | 1.39 | 0.73 | 2.63 |
| Sawada 2010         | Y | 1.99 | 1.04 | 3.81 |
| Sawada 2010         | Y | 1.55 | 0.76 | 3.18 |
| Adams 2008          | Y | 1.43 | 1.07 | 1.92 |
| Adams 2008          | Y | 1.64 | 1.22 | 2.22 |
| Song 2008           | Y | 2.16 | 0.88 | 5.3  |
| Song 2008           | Y | 2.12 | 0.81 | 5.58 |
| Setiawan 2007       | N | 1.14 | 0.84 | 1.55 |
| Setiawan 2007       | N | 2.03 | 1.31 | 3.15 |
| Reeves 2007         | Y | 1.1  | 0.94 | 1.28 |
| Reeves 2007         | Y | 1.19 | 0.99 | 1.44 |
| Luo 2007            | Y | 1.2  | 0.9  | 1.7  |
| Lukanova 2006       | Y | 1.3  | 0.51 | 3.56 |
| Lukanova 2006       | Y | 0.92 | 0.31 | 2.58 |
| Pischon 2006        | N | 0.67 | 0.39 | 1.18 |
| Pischon 2006        | N | 0.84 | 0.49 | 1.43 |
| Pischon 2006        | N | 1.99 | 1.03 | 3.88 |
| Samanic 2006        | N | 1.28 | 1.1  | 1.49 |
| Oh 2005             | Y | 1.23 | 0.94 | 1.61 |
| Oh 2005             | Y | 1.89 | 1.37 | 2.6  |
| Flaherty 2005       | Y | 2.4  | 0.9  | 6.8  |
| Flaherty 2005       | Y | 2.1  | 0.7  | 6.6  |
| Flaherty 2005       | Y | 1.6  | 0.9  | 2.5  |
| Flaherty 2005       | Y | 2.2  | 1.2  | 4.1  |
| Van Dijk 2004       | Y | 0.92 | 0.61 | 1.38 |
| Van Dijk 2004       | Y | 1.46 | 0.97 | 2.21 |
| Nicodemus 2004      | Y | 1.46 | 0.77 | 2.74 |
| Nicodemus 2004      | Y | 1.87 | 1.02 | 3.41 |
| Bjorge 2004         | Y | 1.18 | 1.11 | 1.26 |
| Bjorge 2004         | Y | 1.32 | 1.21 | 1.45 |
| Chow 2000           | Y | 1.7  | 1.1  | 2.5  |
| Chow 2000           | Y | 1.9  | 1.3  | 2.7  |

---

| study | age | rr | lci | uci |
|-------|-----|----|-----|-----|
|-------|-----|----|-----|-----|

---

|                     |   |      |      |       |
|---------------------|---|------|------|-------|
| Been 2016           | Y | 1.04 | 0.64 | 1.7   |
| Geoffrey 2015       | Y | 1.73 | 1.24 | 2.42  |
| Kristen 2014        | N | 1.47 | 1.1  | 1.96  |
| Kristen 2014        | N | 1.91 | 1.33 | 2.75  |
| Kristen 2014        | N | 2.48 | 1.61 | 3.8   |
| Karami 2013         | N | 2.41 | 1.98 | 2.94  |
| Karami 2013         | N | 2.49 | 1.74 | 3.57  |
| Macleod 2013        | Y | 1.2  | 0.81 | 1.78  |
| Macleod 2013        | Y | 1.71 | 1.06 | 2.79  |
| Haggstrom 2013      | Y | 1.51 | 1.13 | 2.03  |
| Haggstrom 2013      | Y | 2.21 | 1.32 | 3.7   |
| Van Hemelrijck 2012 | N | 1.06 | 0.58 | 1.93  |
| Adams 2008          | Y | 1.87 | 1.38 | 2.53  |
| Adams 2008          | Y | 2.47 | 1.72 | 3.53  |
| Song 2008           | Y | 3.25 | 0.95 | 11.1  |
| Setiawan 2007       | N | 1.76 | 1.2  | 2.58  |
| Setiawan 2007       | N | 2.27 | 1.37 | 3.74  |
| Reeves 2007         | Y | 1.52 | 1.31 | 1.77  |
| Luo 2007            | Y | 1.5  | 1    | 2.1   |
| Luo 2007            | Y | 1.6  | 1.1  | 2.4   |
| Lukanova 2006       | Y | 3.63 | 1.23 | 10.66 |
| Lukanova 2006       | Y | 1.79 | 0.55 | 5.27  |
| Pischon 2006        | N | 1.22 | 0.74 | 2.03  |
| Pischon 2006        | N | 2.25 | 1.14 | 4.44  |
| Samanic 2006        | N | 1.82 | 1.41 | 2.35  |
| Oh 2005             | Y | 1.62 | 0.66 | 3.94  |
| Flaherty 2005       | Y | 2.1  | 0.7  | 6.8   |
| Van Dijk 2004       | Y | 1.04 | 0.54 | 1.99  |
| Nicodemus 2004      | Y | 2.49 | 1.39 | 4.44  |
| Bjorge 2004         | Y | 1.55 | 1.36 | 1.76  |
| Bjorge 2004         | Y | 1.85 | 1.66 | 2.06  |

---
